# Supplementary figures and images for: Effect of Vitamin-D-Enriched Edible Mushrooms on Vitamin D Status, Bone Health and Expression of CYP2R1, CYP27B1 and VDR Gene in Wistar Rats
Source: MDPI journal article supplement (doi:10.3390/jof8080864), 2022-08-17

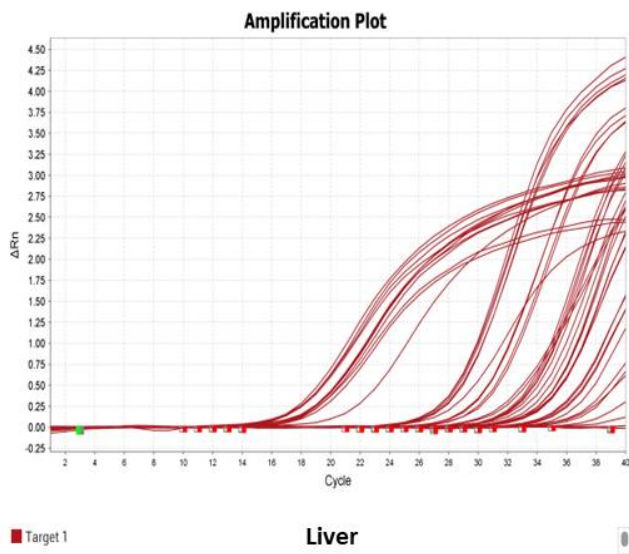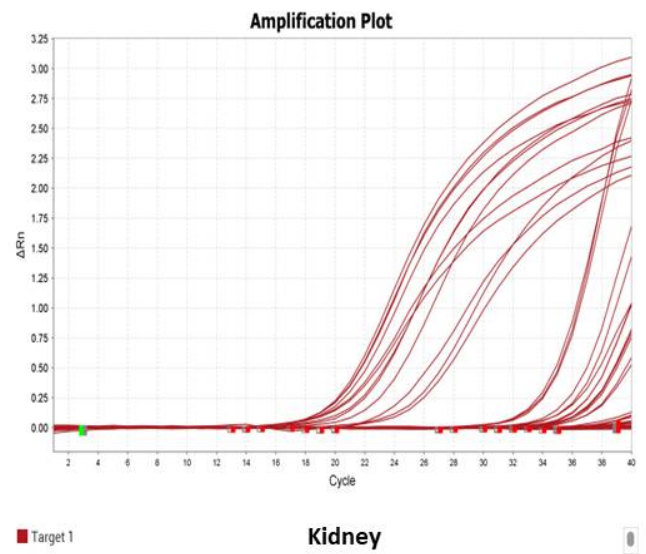

**Figure S1.** Real-time PCR amplification plots of CYP2R1, CYP27B1 and VDR gene in liver and kidney tissue.

Supplement: s1 [file s1]
